# Supplementary material for: Burden of Disease Associated with Dietary Exposure to Aflatoxins in China in 2020
Source: MDPI journal article supplement (doi:10.3390/nu14051027), 2022-02-28
Supplement: s1 [file s1]

## Supplemental Material

**Table S1.** Retrieval strategies and results about aflatoxins in China in 2010-2020.

| Databases #              | Retrieval Strategy                                                                                                                                                | Number of Articles |
|--------------------------|-------------------------------------------------------------------------------------------------------------------------------------------------------------------|--------------------|
| Pubmed                   | aflatoxin AND (exposure OR "risk assessment" OR contaminants)<br>AND China AND ("2010/01/01" : "2020/12/31")                                                      | 696                |
| CNKI<br>(In Chinese)     | (TKA= aflatoxin OR TKA=AFB1) AND (TKA= exposure OR<br>TKA=risk OR TKA=food OR TKA= assessment OR TKA=<br>contaminants) * Date: 2010-2020                          | 2427               |
| WAN FANG<br>(In Chinese) | Title or Keyword: (aflatoxin OR AFB1) * Title or Keyword:<br>(exposure OR risk OR food OR assessment OR contaminants) *<br>Language: Chinese<br>* Date: 2010-2020 | 2090               |
| CBMdisc<br>(In Chinese)  | “(aflatoxin OR AFB1) AND (exposure OR risk OR food OR<br>assessment OR contaminants)” * Date: 2010-2020”                                                          | 426                |

# China National Knowledge Internet (CNKI), Wan Fang, and China Biology Medicine Disc (CBMdisc) are the professional academic databases of China. TKA: Title or Keyword or Abstract.

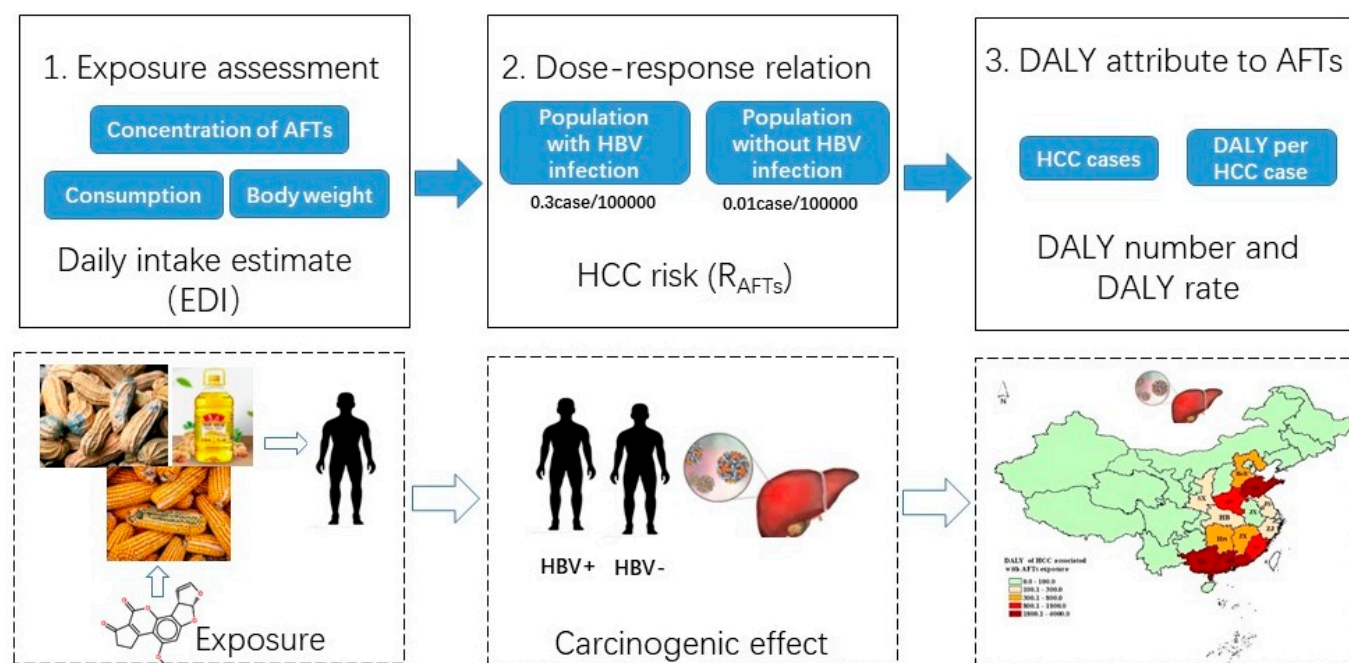

**Figure S1.** The framework of study design.

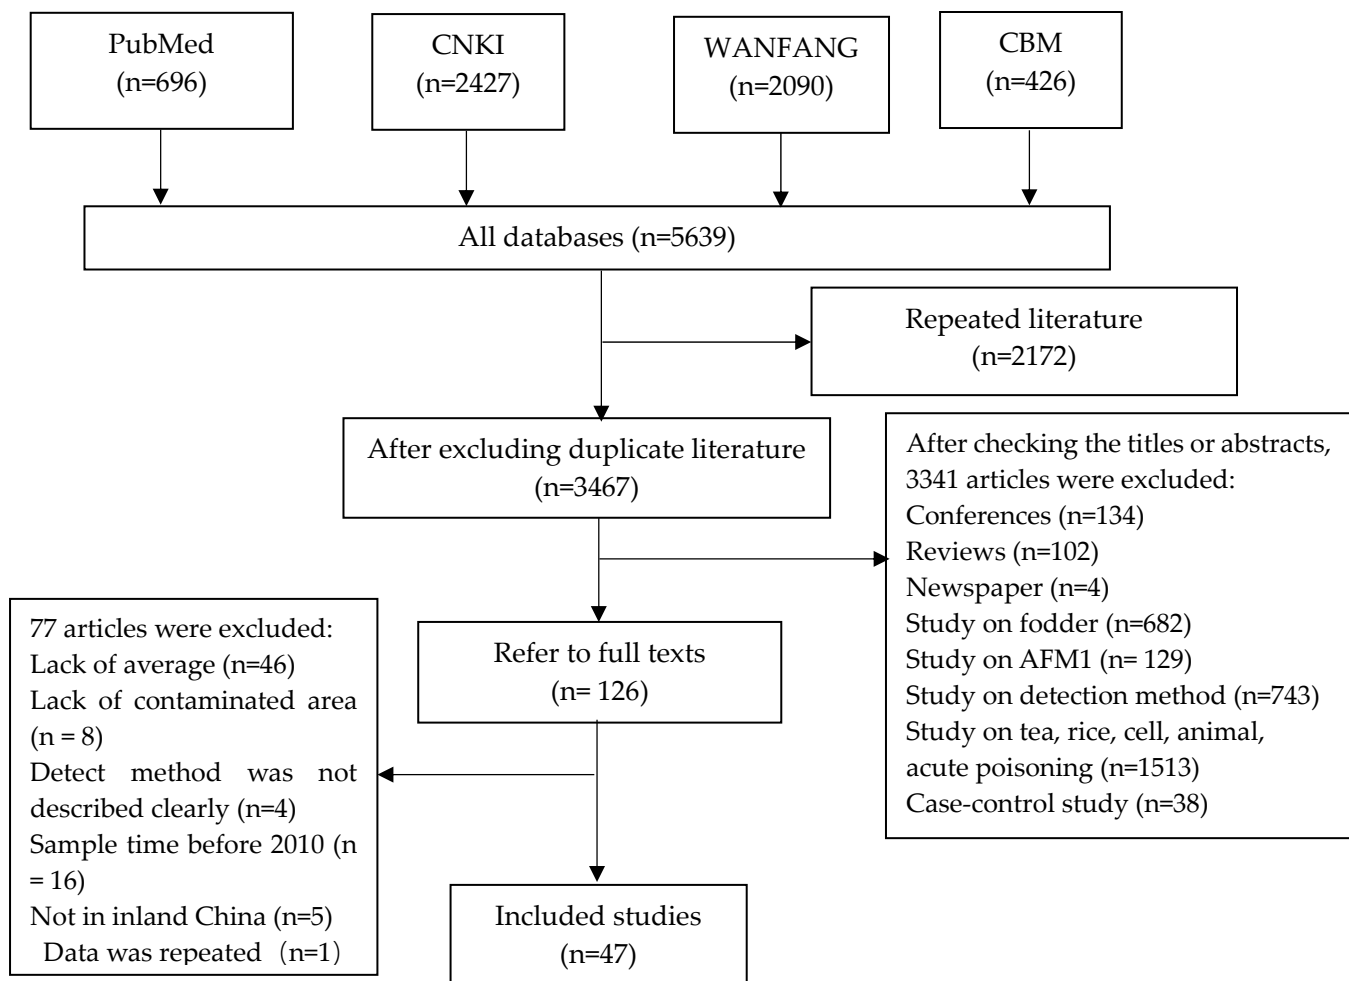

**Figure S2.** Flow chart of literature retrieval about aflatoxin contaminate. Notes: The retrieval results shown that we identified 696 titles from PubMed, 2427 titles from CNKI, 2090 titles from WANFANG, and 426 titles from CBMdisc. We filter titles and abstracts to identify articles that meet the requirements. There were 2172 repeated studies. After deduplication, 3467 articles were screened. Then checked the titles and abstracts, 3341 articles were excluded because some conferences, reviews, reports, newspapers, or the research content were about fodder, AFM1, detection method, and other contents that did not conform to this study. After a full-text review, we removed 77 papers, due to the lack of average, contaminated area data, the time of sample was not in conformity with our requirements. Finally, we included 47 studies that provided information about the contamination of AFTs in peanut, peanut oil, corn and corn product. We used a standardized database to extract the title, journal, location, study year, sample time, detection methods.

### **DALY calculator**

DALY was calculated as the sum of the years of life lost (YLL) and the years lived with disability (YLD). The DALY was estimated by using the following formula:

$$\text{DALYs} = \text{YLL} + \text{YLD}$$

$$\text{YLL} = N * L$$

$$\text{YLD} = I * DW * L'$$

DALYs meant Disability-adjusted life years; YLL meant the years of life lost; YLD meant the years lived with disability; N meant number of deaths; L meant the remaining life expectancy at death; P meant prevalence; I meant the number of new cases; DW meant disability weights; L' meant the time of disease duration. The World Health Organization provided the templates to calculate DALY. But firstly, we need to calculate the L'. So we used Dismod II software to estimate the L'. Then we substituted population data, liver cancer incidence data, death data, duration and other parameters into the DALY calculation template to obtain the total DALY number. The average number of DALYs in each case was obtained by dividing the number of DALYs by the total number of cases.

Dismod II software was developed by WHO (download from [http://www.epigear.com/index\\_files/dismod\\_ii.html](http://www.epigear.com/index_files/dismod_ii.html)), which was an epidemiological model and could be used to calculate the parameters related to DALY. **The main interface of the DALY calculator was shown below:**

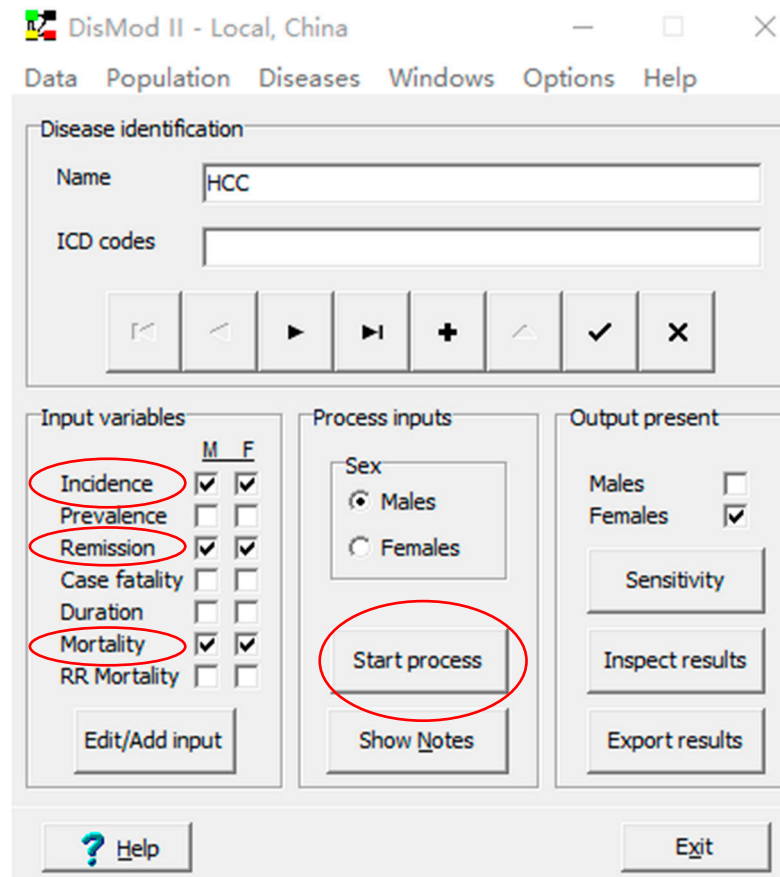

A

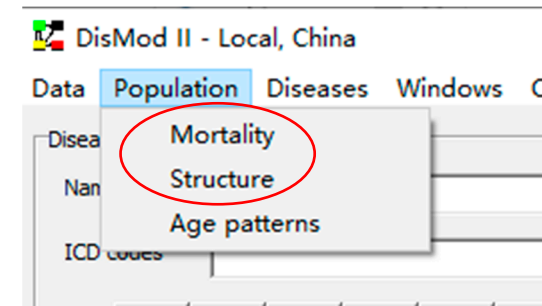

B

**Figure S3.** The main interface of the DALY calculator. (A) the main interface; (B) total population mortality and structure input interface input incidence, remission, mortality, and the total population mortality and structure, and then click on the “start process”.

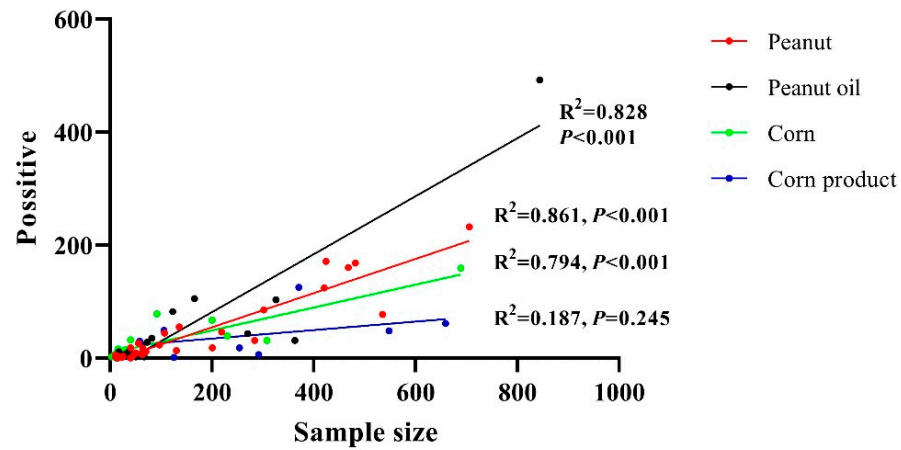

| Peanut                       | Peanut oil                   | Corn                         | Corn product                  |
|------------------------------|------------------------------|------------------------------|-------------------------------|
| $Y = 0.3027 \cdot X - 6.073$ | $Y = 0.5128 \cdot X - 21.23$ | $Y = 0.2022 \cdot X + 8.606$ | $Y = 0.07515 \cdot X + 19.55$ |

**Figure S4.** Correlation between the AFTs positive rate and the total number of test samples. The positive number of aflatoxins in peanut, peanut oil, and corn were correlated with the number of tested samples ( $P<0.001$ ). While the Positive number of aflatoxins in corn product was not associated with the number of tested samples ( $P=0.245$ ).

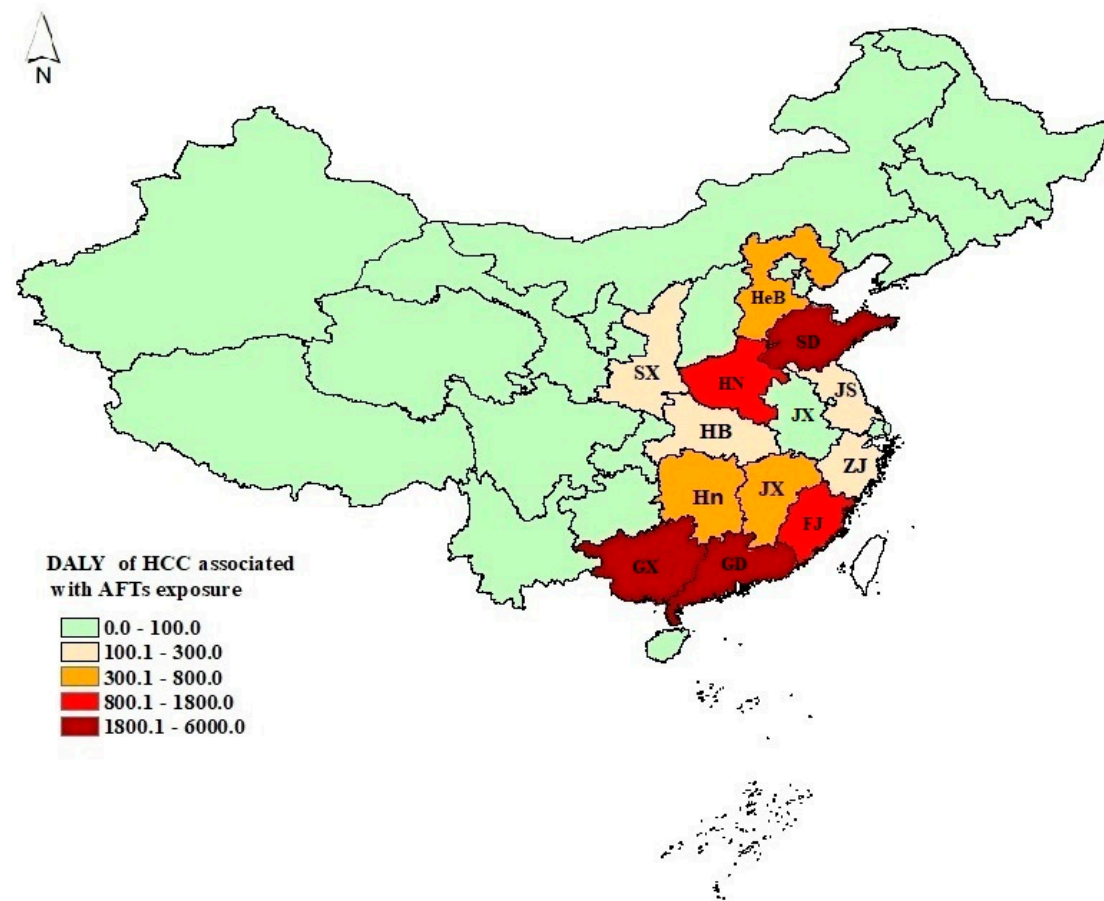

**Figure S5.** DALY of HCC associated with AFTs exposure from peanuts, peanut oil, corn, and corn products. HeB: Hebei, HB: Hubei, SD: Shandong, SX: Shaanxi, HN: Henan; JS: Jiangsu; Hn: Hunan, JX: Jiangxi; ZJ: Zhejiang, FJ: Fujian, GD: Guangdong, GX: Guangxi,

**Table S2.** Relevant information of aflatoxin contaminate in peanuts.

| Province  | Sample Time<br>(year) | Aflatoxin | Detection Method                     | Number | Positive<br>Number | Mean( $\mu\text{g/kg}$ ) | weighted<br>Means<br>( $\mu\text{g/kg}$ ) | Max( $\mu\text{g/kg}$ ) | Literature           |
|-----------|-----------------------|-----------|--------------------------------------|--------|--------------------|--------------------------|-------------------------------------------|-------------------------|----------------------|
| Anhui     | 2010                  | AFTs      | UPLC-MS / MS                         | 58     | 16                 | 0.26                     | 9.25                                      | -                       | Ma et al, 2010[1]    |
| Anhui     | 2010                  | AFB1      | HPLC                                 | 82     | 25                 | 4.48                     |                                           | -                       | Ding et al, 2015[2]  |
| Anhui     | 2011                  | AFB1      | HPLC                                 | 149    | 68                 | 2.48                     |                                           | -                       | Ding et al, 2015[2]  |
| Anhui     | 2012                  | AFB1      | HPLC                                 | 150    | 32                 | 2.94                     |                                           | -                       | Ding et al, 2015[2]  |
| Anhui     | 2013                  | AFB1      | HPLC                                 | 149    | 61                 | 12.66                    |                                           | -                       | Ding et al, 2015[2]  |
| Anhui     | 2014                  | AFB1      | HPLC                                 | 79     | 22                 | 43.11                    |                                           | -                       | Ding et al, 2015[2]  |
| Anhui     | 2013-2018             | AFTs      | HPLC-MS/MS                           | 39     | 8                  | 1.1                      |                                           | 14.49                   | Qin et al, 2020[3]   |
| Beijing   | 2013-2018             | AFTs      | HPLC-MS/MS                           | 15     | 3                  | 0.71                     | 0.71                                      | 0.73                    | Qin et al, 2020[3]   |
| Chongqing | 2013-2014             | AFTs      | UPLC                                 | 100    | 39                 | 0.834                    | 0.97                                      | 157.2                   | Zhang et al, 2016[4] |
| Chongqing | 2013                  | AFB1      | ELISA                                | 16     | 16                 | 1.74                     |                                           | 4.04                    | Feng et al, 2014[5]  |
| Chongqing | 2013-2018             | AFTs      | HPLC-MS/MS                           | 20     | 0                  | 1.01                     |                                           | 1.4                     | Qin et al, 2020[3]   |
| Fujian    | 2010-2011             | AFTs      | HPLC-photochemical<br>derivatization | 62     | 19                 | 39.025                   | 14.02                                     | 815                     | Qiu et al, 2012[6]   |
| Fujian    | 2014-2015             | AFB1      | HPLC-fluorometer                     | 173    | >0                 | 6.76                     |                                           | 332.28                  | Liu and Pan, 2016[7] |
| Fujian    | 2010                  | AFTs      | UPLC-MS / MS                         | 27     | 7                  | 1.15                     |                                           | 3.7                     | Ma et al, 2010[1]    |
| Fujian    | 2013-2018             | AFTs      | HPLC-MS/MS                           | 22     | 5                  | 16.49                    |                                           | 356.7                   | Qin et al, 2020[3]   |
| Gansu     | 2010                  | AFTs      | UPLC-MS / MS                         | 30     | 6                  | 0.46                     | 0.59                                      | -                       | Ma et al, 2010[1]    |
| Gansu     | 2013-2018             | AFTs      | HPLC-MS/MS                           | 33     | 0                  | 0.7                      |                                           | 3                       | Qin et al, 2020[3]   |
| Guangdong | 2015-2017             | AFTs      | UPLC                                 | 92     | 40                 | 0.44                     | 11.73                                     | 15.816                  | Li et al, 2018[8]    |

|              |           |      |                  |     |    |       |       |       |                       |
|--------------|-----------|------|------------------|-----|----|-------|-------|-------|-----------------------|
| Guangdong    | 2013-2018 | AFTs | HPLC-MS/MS       | 74  | 13 | 5.13  |       | 291.5 | Qin et al, 2020[3]    |
| Guangdong    | 2015      | AFB1 | HPLC             | 136 | 32 | 22.95 |       | 862   | Pan, 2016[9]          |
| Guangxi      | 2010      | AFTs | UPLC-MS / MS     | 34  | 26 | 12.75 | 7.78  | 107.9 | Ma et al, 2010[1]     |
| Guangxi      | 2013-2018 | AFTs | HPLC-MS/MS       | 22  | 0  | 0.09  |       | 0.09  | Qin et al, 2020[3]    |
| Guizhou      | 2013-2018 | AFTs | HPLC-MS/MS       | 23  | 1  | 0.21  | 0.21  | 0.59  | Qin et al, 2020[3]    |
| Hainan       | 2010      | AFTs | UPLC-MS / MS     | 6   | 0  | 0     | 0.47  |       | Ma et al, 2010[1]     |
| Hainan       | 2013-2018 | AFTs | HPLC-MS/MS       | 10  | 1  | 0.16  |       | 0.4   | Qin et al, 2020[3]    |
| Hainan       | 2019      | AFB1 | HPLC-MS/MS       | 30  | 4  | 0.67  |       | 10.27 | Wang et al, 2019[10]  |
| Hebei        | 2017      | AFTs | HPLC-fluorometer | 10  | 10 | 67.72 | 21.42 |       | Cheng et al. 2018[11] |
| Hebei        | 2013-2018 | AFTs | HPLC-MS/MS       | 30  | 8  | 5.99  |       | 67.8  | Qin et al, 2020[3]    |
| Heilongjiang | 2013-2018 | AFTs | HPLC-MS/MS       | 10  | 2  | 0.41  | 0.41  | 2.92  | Qin et al, 2020[3]    |
| Henan        | 2014-2015 | AFTs | HPLC-fluorometer | 30  | 18 | 4.57  | 5.89  | 16.1  | Li et al, 2017[12]    |
| Henan        | 2017      | AFTs | HPLC-fluorometer | 10  | 5  | 27.69 |       |       | Cheng et al. 2018[11] |
| Henan        | 2013-2018 | AFTs | HPLC-MS/MS       | 67  | 21 | 3.22  |       | 16.18 | Qin et al, 2020[3]    |
| Hubei        | 2010      | AFTs | UPLC-MS / MS     | 29  | 20 | 20.43 | 6.55  | 339.6 | Ma et al, 2010[1]     |
| Hubei        | 2010      | AFB1 | HPLC             | 93  | 63 | 3.18  |       | 4.29  | Ding et al, 2015[2]   |
| Hubei        | 2011      | AFB1 | HPLC             | 99  | 31 | 2.98  |       | 0.64  | Ding et al, 2015[2]   |



|         |           |      |                  |     |    |       |       |        |                       |
|---------|-----------|------|------------------|-----|----|-------|-------|--------|-----------------------|
| Hubei   | 2012      | AFB1 | HPLC             | 47  | 10 | 2.33  |       | 7.96   | Ding et al, 2015[2]   |
| Hubei   | 2013      | AFB1 | HPLC             | 98  | 33 | 14.86 |       | 73.23  | Ding et al, 2015[2]   |
| Hubei   | 2014      | AFB1 | HPLC             | 17  | 0  | 0     |       | 0      | Ding et al, 2015[2]   |
| Hubei   | 2013-2018 | AFTs | HPLC-MS/MS       | 41  | 14 | 0.72  |       | 7.92   | Qin et al, 2020[3]    |
| Hunan   | 2010      | AFTs | UPLC-MS/MS       | 15  | 4  | 0.57  | 13.49 | -      | Ma et al, 2010[1]     |
| Hunan   | 2010      | AFB1 | HPLC             | 70  | 30 | 3     |       | 2.08   | Ding et al, 2015[2]   |
| Hunan   | 2011      | AFB1 | HPLC             | 86  | 50 | 11.96 |       | 33.4   | Ding et al, 2015[2]   |
| Hunan   | 2012      | AFB1 | HPLC             | 140 | 33 | 15.49 |       | 48.56  | Ding et al, 2015[2]   |
| Hunan   | 2013      | AFB1 | HPLC             | 110 | 34 | 21.51 |       | 113.5  | Ding et al, 2015[2]   |
| Hunan   | 2014      | AFB1 | HPLC             | 7   | 0  | 0     |       | 0      | Ding et al, 2015[2]   |
| Hunan   | 2013-2018 | AFTs | HPLC-MS/MS       | 40  | 9  | 13.28 | 3.33  | 251.87 | Qin et al, 2020[3]    |
| Jiangsu | 2010      | AFB1 | HPLC             | 60  | 0  | 0     |       | 0      | Ding et al, 2015[2]   |
| Jiangsu | 2011      | AFB1 | HPLC             | 100 | 55 | 0.56  |       | 0.39   | Ding et al, 2015[2]   |
| Jiangsu | 2012      | AFB1 | HPLC             | 100 | 14 | 0.44  |       | 0.2    | Ding et al, 2015[2]   |
| Jiangsu | 2013      | AFB1 | HPLC             | 100 | 53 | 12.79 |       | 59.95  | Ding et al, 2015[2]   |
| Jiangsu | 2014      | AFB1 | HPLC             | 12  | 0  | 0     |       | 0      | Ding et al, 2015[2]   |
| Jiangsu | 2013-2018 | AFTs | HPLC-MS/MS       | 49  | 2  | 0.44  |       | 3.5    | Qin et al, 2020[3]    |
| Jiangxi | 2010      | AFTs | UPLC-MS / MS     | 23  | 7  | 28.82 | 10.81 | 166.8  | Ma et al, 2010[1]     |
| Jiangxi | 2010      | AFB1 | HPLC             | 92  | 37 | 6.59  |       | 12.43  | Ding et al, 2015[2]   |
| Jiangxi | 2011      | AFB1 | HPLC             | 93  | 54 | 11.41 |       | 39.35  | Ding et al, 2015[2]   |
| Jiangxi | 2012      | AFB1 | HPLC             | 130 | 44 | 6.49  |       | 21.76  | Ding et al, 2015[2]   |
| Jiangxi | 2013      | AFB1 | HPLC             | 100 | 20 | 11.73 |       | 46.56  | Ding et al, 2015[2]   |
| Jiangxi | 2014      | AFB1 | HPLC             | 24  | 2  | 7.98  |       | 0      | Ding et al, 2015[2]   |
| Jiangxi | 2013-2018 | AFTs | HPLC-MS/MS       | 20  | 4  | 33.7  |       | 343.15 | Qin et al, 2020[3]    |
| Jilin   | 2013-2018 | AFTs | HPLC-MS/MS       | 10  | 3  | 1.7   | 1.28  | 1.93   | Qin et al, 2020[3]    |
| Jilin   | 2017      | AFTs | HPLC-fluorometer | 15  | 0  | 1     |       | 1      | Cheng et al. 2018[11] |

|           |           |      |                  |     |    |       |       |        |                          |
|-----------|-----------|------|------------------|-----|----|-------|-------|--------|--------------------------|
| Liaoning  | 2017      | AFTs | HPLC-fluorometer | 10  | 0  | 1     | 0.34  | 1      | Cheng et al. 2018[11]    |
| Liaoning  | 2019-2020 | AFTs | HPLC-MS/MS       | 120 | 13 | 0.28  |       | 6.616  | Wang et al, 2020[13]     |
| Neimongol | 2017      | AFTs | HPLC-fluorometer | 5   | 0  | 1     | 0.34  | 1      | Cheng et al. 2018[11]    |
| Neimongol | 2013-2018 | AFTs | HPLC-MS/MS       | 10  | 0  | 0.01  |       | 0.01   | Qin et al, 2020[3]       |
| Ningxia   | 2013-2018 | AFTs | HPLC-MS/MS       | 10  | 5  | 0.89  | 0.89  | 4.59   | Qin et al, 2020[3]       |
| Qinghai   | 2013-2018 | AFTs | HPLC-MS/MS       | 14  | 0  | 1.2   | 1.2   | 4      | Qin et al, 2020[3]       |
| Shaanxi   | 2012-2015 | AFTs | UPLC             | 37  | 9  | 34    | 34.50 | 323    | Hu et al, 2016[14]       |
| Shaanxi   | 2013-2018 | AFTs | HPLC-MS/MS       | 27  | 8  | 35.18 |       | 316.17 | Qin et al, 2020[3]       |
| Shandong  | 2017      | AFTs | HPLC-fluorometer | 110 | 17 | 2.95  | 1.95  |        | Cheng et al,<br>2018[11] |
| Shandong  | 2013-2018 | AFTs | HPLC-MS/MS       | 91  | 1  | 0.74  |       | 11.4   | Qin et al, 2020[3]       |
| Shanghai  | 2010      | AFTs | UPLC-MS/MS       | 54  | 22 | 18.19 | 12.09 | 334.7  | Ma et al, 2010[1]        |
| Shanghai  | 2013-2018 | AFTs | HPLC-MS/MS       | 43  | 1  | 4.43  |       | 18.44  | Qin et al, 2020[3]       |
| Shanxi    | 2013-2018 | AFTs | HPLC-MS/MS       | 16  | 0  | 4     | 4.00  | 4      | Qin et al, 2020[3]       |
| Sichuan   | 2017      | AFTs | HPLC             | 24  | 4  | 0.3   | 5.75  | -      | Zhang et al, 2019[15]    |
| Sichuan   | 2010      | AFB1 | HPLC             | 80  | 2  | 0.3   |       | 0      | Ding et al, 2015[2]      |
| Sichuan   | 2011      | AFB1 | HPLC             | 97  | 21 | 8.37  |       | 4.82   | Ding et al, 2015[2]      |
| Sichuan   | 2012      | AFB1 | HPLC             | 140 | 26 | 8.19  |       | 22.63  | Ding et al, 2015[2]      |
| Sichuan   | 2013      | AFB1 | HPLC             | 140 | 21 | 7.41  |       | 8.59   | Ding et al, 2015[2]      |
| Sichuan   | 2013-2018 | AFTs | HPLC-MS/MS       | 54  | 3  | 0.93  |       | 8.31   | Qin et al, 2020[3]       |
| Tianjin   | 2013-2018 | AFTs | HPLC-MS/MS       | 19  | 0  | 2.17  | 7.47  | 4      | Qin et al, 2020[3]       |
| Tianjin   | 2016-2018 | AFB1 | UPLC-MS/MS       | 200 | 46 | 7.97  |       | 189    | Wu et al, 2019[16]       |
| Xinjiang  | 2013-2018 | AFTs | HPLC-MS/MS       | 40  | 0  | 0.11  | 0.11  | 0.13   | Qin et al, 2020[3]       |
| Xizang    | 2017      | AFTs | HPLC             | 23  | 0  | 0     | 0.00  | -      | Zhang et al, 2019[15]    |
| Yunan     | 2017      | AFTs | HPLC             | 24  | 1  | 0.25  | 0.56  | -      | Zhang et al, 2019[15]    |
| Yunnan    | 2010      | AFTs | UPLC-MS / MS     | 16  | 10 | 0.27  |       | -      | Ma et al, 2010[1]        |
| Yunnan    | 2013-2018 | AFTs | HPLC-MS/MS       | 30  | 0  | 0.97  |       | 2      | Qin et al, 2020[3]       |
| Zhejiang  | 2013-2018 | AFTs | HPLC-MS/MS       | 50  | 9  | 9.9   | 9.9   | 249.17 | Qin et al, 2020[3]       |

AFTs: includes four aflatoxins: AFB1, AFB2, AFG1, AFG2.

**Table S3.** Relevant information of aflatoxin contaminate in peanut oil.

| Province  | Sample Time<br>(year) | Aflatoxin | Detection Method                         | Number | Positive<br>Number | Mean( $\mu\text{g/kg}$ ) | weighted<br>Means<br>( $\mu\text{g/kg}$ ) | Max( $\mu\text{g/kg}$ ) | Literature               |
|-----------|-----------------------|-----------|------------------------------------------|--------|--------------------|--------------------------|-------------------------------------------|-------------------------|--------------------------|
| Chongqing | 2013                  | AFB1      | ELISA                                    | 16     | 16                 | 0.29                     | 0.99                                      | 0.51                    | Feng et al,<br>2014[5]   |
| Chongqing | 2013-2018             | AFTs      | HPLC-MS/MS                               | 27     | 0                  | 1.4                      |                                           | 1.40                    | Qin et al, 2020[3]       |
| Chongqing | 2013-2014             | AFTs      | HPLC-<br>photochemical<br>derivatization | 30     | 12                 | 0.13                     |                                           |                         | Zhang et al,<br>2016[4]  |
| Fujian    | 2010-2011             | AFTs      | HPLC-<br>photochemical<br>derivatization | 20     | 9                  | 2.962                    | 27.42                                     | 11.4                    | Qiu et al, 2012[6]       |
| Fujian    | 2013-2018             | AFTs      | HPLC-MS/MS                               | 146    | 96                 | 30.77                    |                                           | 583.09                  | Qin et al, 2020[3]       |
| Guangdong | 2016-2017             | AFB1      | ELISA and UPLC-<br>MS/MS                 | 427    | 80                 | 4.3881                   | 14.42                                     | 234.8                   | Qi et al, 2019[17]       |
| Guangdong | 2017                  | AFB1      | HPLC-<br>photochemical<br>derivatization | 3221   | 1833               | 12.9                     |                                           | 950                     | Song et al,<br>2019[18]  |
| Guangdong | 2012-2013             | AFTs      | HPLC-<br>photochemical<br>derivatization | 30     | -                  | 13.21                    |                                           | 75.3                    | Li et al, 2014[19]       |
| Guangdong | 2017                  | AFB1      | HPLC                                     | 126    | 111                | 16.2                     |                                           | 288                     | Yin et al,<br>2017[20]   |
| Guangdong | 2012-2018             | AFB1      | ELISA                                    | 248    | 214                | 12.83                    |                                           | 181                     | Chen et al,<br>2017[21]  |
| Guangdong | 2019                  | AFB1      | ELISA                                    | 243    | 53                 | 21.3                     |                                           | 114                     | Huang et al,<br>2019[22] |

|           |           |      |                                   |     |     |       |       |         |                       |
|-----------|-----------|------|-----------------------------------|-----|-----|-------|-------|---------|-----------------------|
| Guangdong | 2015-2017 | AFB1 | HPLC                              | 96  | 74  | 38.74 |       | 283     | Zhang et al, 2020[23] |
| Guangdong | 2013-2018 | AFTs | HPLC-MS/MS                        | 153 | 113 | 37.63 |       | 1043.50 | Qin et al, 2020[3]    |
| Guangdong | 2015      | AFB1 | HPLC                              | 200 | 110 | 26.69 |       | 119.7   | Pan, 2016[9]          |
| Guangdong | 2015-2017 | AFTs | UPLC                              | 53  | 35  | 2.69  |       | 30.8    | Li et al, 2018[8]     |
| Guangxi   | 2017      | AFB1 | HPLC-fluorometer                  | 146 | 114 | 30.8  | 31.92 | 320     | Cheng et al, 2017[24] |
| Guangxi   | 2020      | AFB1 | HPLC-photochemical derivatization | 183 | 108 | 16.91 |       | 243     | Liang et al, 2020[25] |
| Guangxi   | 2014-2017 | AFB1 |                                   | 310 | 231 | 16.76 |       | 510.01  | Wang et al, 2020[26]  |
| Guangxi   | 2014      | AFB1 | HPLC-fluorometer                  | 39  | >18 | 70.2  |       | 139.8   | Liu et al, 2015[27]   |
| Guangxi   | 2014      | AFB1 | HPLC-fluorometer                  | 43  | >16 | 160.3 |       | 320     | Liu et al, 2015[27]   |
| Guangxi   | 2014      | AFB1 | HPLC-fluorometer                  | 47  | >12 | 74.9  |       | 149.4   | Liu et al, 2015[27]   |
| Guangxi   | 2013-2018 | AFTs | HPLC-MS/MS                        | 76  | 39  | 13.18 |       | 149.50  | Qin et al, 2020[3]    |
| Guizhou   | 2013-2018 | AFTs | HPLC-MS/MS                        | 17  | 11  | 1.02  | 1.02  | 3.37    | Qin et al, 2020[3]    |
| Hebei     | 2013-2018 | AFTs | HPLC-MS/MS                        | 82  | 35  | 7.08  | 7.08  | 200.25  | Qin et al, 2020[3]    |

|          |           |      |                  |     |     |        |       |        |                      |
|----------|-----------|------|------------------|-----|-----|--------|-------|--------|----------------------|
| Henan    | 2014-2015 | AFTs | HPLC-fluorometer | 87  | 14  | 1.3    | 1.99  | 13.2   | Li et al, 2017[28]   |
| Henan    | 2013-2018 | AFTs | HPLC-MS/MS       | 183 | 29  | 2.32   |       | 21.32  | Qin et al, 2020[3]   |
| Hubei    | 2013-2018 | AFTs | HPLC-MS/MS       | 67  | 2   | 1.60   | 1.60  | 2.00   | Qin et al, 2020[3]   |
| Jiangsu  | 2013-2018 | AFTs | HPLC-MS/MS       | 33  | 8   | 1.31   | 1.31  | 4.00   | Qin et al, 2020[3]   |
| Jiangxi  | 2013-2018 | AFTs | HPLC-MS/MS       | 38  | 12  | 10.29  | 10.29 | 32.99  | Qin et al, 2020[3]   |
| Jilin    | 2013-2018 | AFTs | HPLC-MS/MS       | 13  | 0   | 0.5    | 0.50  | 0.50   | Qin et al, 2020[3]   |
| Liaoning | 2013-2018 | AFTs | HPLC-MS/MS       | 50  | 2   | 1.68   | 1.68  | 4.23   | Qin et al, 2020[3]   |
| Shaanxi  | 2012-2015 | AFTs | UPLC             | 61  | 41  | 1.2    | 1.14  | 5.84   | Hu et al, 2016[14]   |
| Shaanxi  | 2014      | AFTs | HPLC-MS/MS       | 7   | 7   | 1.15   |       | 3.24   | Li and Ma, 2016[29]  |
| Shaanxi  | 2013-2018 | AFTs | HPLC-MS/MS       | 55  | 34  | 1.08   |       | 5.64   | Qin et al, 2020[3]   |
| Shandong | 2013-2018 | AFTs | HPLC-MS/MS       | 326 | 103 | 6.78   | 6.78  | 317.20 | Qin et al, 2020[3]   |
| Yunnan   | 2010      | AFB1 | ELISA            | 5   | 5   | 6.819  | 3.44  | 10.027 | Lan et al, 2010[30]  |
| Yunnan   | 2013-2018 | AFTs | HPLC-MS/MS       | 23  | 1   | 2.71   |       | 4.21   | Qin et al, 2020[3]   |
| Zhejiang | 2016      | AFB1 | HPLC             | 345 | 18  | 0.2561 | 0.26  | 4.9    | Zhou et al, 2017[31] |
| Zhejiang | 2013-2018 | AFTs | HPLC-MS/MS       | 18  | 13  | 0.35   |       | 1.09   | Qin et al, 2020[3]   |

AFTs: includes four aflatoxins: AFB1, AFB2, AFG1, AFG2.

**Table S4.** Relevant information of aflatoxin contaminate in corn and corn product.

| Province     | Sample Time<br>(year) | Aflatoxin | Detection<br>Method | Number | Positive<br>Number | Mean( $\mu\text{g/kg}$ ) | weighted<br>Means<br>( $\mu\text{g/kg}$ ) | Max( $\mu\text{g/kg}$ ) | Literature              |
|--------------|-----------------------|-----------|---------------------|--------|--------------------|--------------------------|-------------------------------------------|-------------------------|-------------------------|
| Anhui        | 2010                  | AFTs      | UPLC-MS / MS        | 30     | 15                 | 1.06                     | 1.06                                      | 1.70                    | Ma et al, 2010<br>[30]  |
| Chongqing    | 2013                  | AFB1      | ELISA               | 16     | 16                 | 6.44                     | 6.44                                      | 63.33                   | Feng et al,<br>2014[5]  |
| Fujian       | 2010                  | AFTs      | UPLC-MS / MS        | 16     | 6                  | 0.57                     | 0.57                                      | 0.70                    | Ma et al, 2010[1]       |
| Gansu        | 2010                  | AFTs      | UPLC-MS / MS        | 17     | 3                  | 0.58                     | 0.58                                      | -                       | Ma et al, 2010[1]       |
| Guangxi      | 2017-2019             | AFB1      | HPLC                | 186    | >127               | 177.87                   |                                           | 3089.00                 | Chen, 2020[32]          |
| Guangxi      | 2010                  | AFTs      | UPLC-MS / MS        | 44     | 39                 | 24.72                    |                                           | 581.30                  | Ma et al, 2010[1]       |
| Hainan       | 2010                  | AFTs      | UPLC-MS / MS        | 3      | 2                  | 6.15                     | 6.15                                      | 8.00                    | Ma et al, 2010[1]       |
| Hebei        | 2015-2016             | AFB1      | ELISA               | 92     | 78                 | 8.96                     | 8.96                                      | 61.50                   | Ji et al, 2017[33]      |
| Heilongjiang | 2010                  | AFTs      | UPLC-MS / MS        | 18     | 10                 | 0.57                     | 0.57                                      | -                       | Ma et al, 2010[1]       |
| Henan        | 2014                  | AFB1      | HPLC                | 40     | 32                 | 50.32                    | 50.32                                     | 284.32                  | Wu et al,<br>2014[34]   |
| Hubei        | 2010                  | AFTs      | UPLC-MS / MS        | 20     | 12                 | 3.40                     | 3.40                                      | 9.50                    | Ma et al, 2010[1]       |
| Hunan        | 2010                  | AFTs      | UPLC-MS / MS        | 10     | 7                  | 22.10                    | 22.10                                     | 67.60                   | Ma et al, 2010[1]       |
| Jiangxi      | 2010                  | AFTs      | UPLC-MS / MS        | 11     | 5                  | 0.43                     | 0.43                                      | -                       | Ma et al, 2010[1]       |
| Shaanxi      | 2012-2015             | AFTs      | UPLC                | 268    | 31                 | 1.77                     | 1.54                                      | 16.60                   | Hu et al, 2016[14]      |
| Shaanxi      | 2016                  | AFTs      | HPLC                | 40     | 0                  | 0.02                     |                                           | -                       | Hu et al, 2017[14]      |
| Shandong     | 2016                  | AFTs      | HPLC                | 90     | 8                  | 0.14                     |                                           | 1.69                    | Yang et al,<br>2018[35] |
| Shandong     | 2013-2014             | AFTs      | UPLC-Q-TOF          | 540    | 94                 | 7.62                     |                                           | 573.13                  | Wang et al,<br>2016[36] |

|           |           |      |                      |     |    |       |       |        |                          |
|-----------|-----------|------|----------------------|-----|----|-------|-------|--------|--------------------------|
| Shandong  | 2016      | AFB1 | ELISA                | 59  | 57 | 2.11  | -     | 10.76  | Zhang et al,<br>2017[37] |
| Shanghai  | 2010      | AFTs | UPLC-MS / MS         | 19  | 7  | 1.26  | 1.26  | 2.20   | Ma et al, 2010[1]        |
| Shanxi    | 2010      | AFTs | UPLC-MS / MS         | 13  | 8  | 1.83  | 1.83  | 6.50   | Ma et al, 2010 [1]       |
| Tianjin   | 2016-2018 | AFB1 | UPLC-MS/MS           | 200 | 67 | 8.98  | 8.98  | 206.00 | Wu et al,<br>2019[16]    |
| Yunnan    | 2010      | AFTs | UPLC-MS / MS         | 14  | 11 | 65.74 | 65.74 | 451.80 | Ma et al, 2010[1]        |
| Chongqing | 2013-2014 | AFTs | UPLC                 | 63  | 24 | 0.95  | 0.95  | 29.5   | Zhang et al,<br>2016[4]  |
| Guangdong | 2015-2017 | AFTs | UPLC                 | 90  | 39 | 0.51  | 0.26  | 4. 413 | Li et al, 2018[8]        |
| Guangdong | 2012-2013 | AFTs | HPLC                 | 30  | >0 | 0.19  |       | 0.47   | Li et al, 2014[19]       |
| Guangdong | 2017      | AFB1 | HPLC                 | 46  | 0  | 0.50  |       | <0.5   | Yin et al,<br>2017[20]   |
| Guangdong | 2012-2018 | AFB1 | ELISA                | 43  | 6  | 0.26  |       | 1      | Chen et al,<br>2017[21]  |
| Guangdong | 2015-2017 | AFB1 | HPLC                 | 339 | 3  | 0.17  |       | 6.3    | Zhang et al,<br>2020[23] |
| Guangxi   | 2014-2017 | AFB1 | HPLC                 | 58  | 30 | 3.03  | 3.03  | 43.6   | Wang et al,<br>2020[26]  |
| Henan     | 2014-2015 | AFTs | HPLC-<br>fluorometer | 25  | 0  | 0.97  | 0.81  | -      | Li et al, 2017[12]       |

|          |           |      |                      |     |    |          |      |       |                          |
|----------|-----------|------|----------------------|-----|----|----------|------|-------|--------------------------|
| Henan    | 2014-2015 | AFTs | HPLC-<br>fluorometer | 87  | 6  | 0.61     |      | 22    | Li et al, 2017[12]       |
| Henan    | 2013-2014 | AFB1 | HPLC                 | 447 | >0 | 0.48     |      | 1.81  | Li et al, 2016[28]       |
| Henan    | 2018-2019 | AFB1 | UPLC-MS/MS           | 100 | 55 | 2.44     |      | 140.3 | Li et al, 2020[38]       |
| Jiangsu  | 2011      | AFTs | HPLC                 | 81  | 41 | 10.51198 | 8.06 | 374.2 | Cai et al,<br>2013[39]   |
| Jiangsu  | 2013      | AFTs | HPLC                 | 25  | 8  | 0.12     |      | 0.66  | Zhao et al,<br>2015[40]  |
| Shaanxi  | 2012-2015 | AFTs | UPLC                 | 44  | 0  | 0.07     | 0.37 | -     | Hu et al, 2016[14]       |
| Shaanxi  | 2013-2016 | AFTs | UPLC-MS/MS           | 120 | 6  | 0.60     |      | 16.6  | Hu et al, 2017[41]       |
| Shaanxi  | 2016      | AFTs | HPLC                 | 40  | 5  | 0.07     |      | 0.59  | Hu et al, 2017[42]       |
| Shaanxi  | 2016      | AFTs | HPLC                 | 40  | 1  | 0.02     |      | 0.17  | Hu et al, 2017[42]       |
| Shaanxi  | 2014      | AFTs | HPLC-MS/MS           | 10  | 6  | 1.62     |      | 6.09  | Li and Ma,<br>2016[29]   |
| Shandong | 2016      | AFTs | UPLC-MS/MS           | 90  | 29 | 0.23     | 1.44 | 8.04  | Jiang et al,<br>2019[43] |
| Shandong | 2015      | AFTs | HPLC-<br>fluorometer | 40  | 18 | 3.70     |      | 17.7  | Wang and<br>Ma,2015[44]  |
| Shandong | 2014-2017 | AFTs | HPLC                 | 91  | >0 | 0.15     |      | 3.44  | Gong et al,<br>2018[45]  |
| Shandong | 2011-2013 | AFTs | UPLC                 | 150 | 78 | 2.352    |      | 8.54  | Yang et al,<br>2016[46]  |
| Yunnan   | 2012-2017 | AFB1 | UPLC-MS/MS           | 292 | >6 | 1.83     | 1.83 | 2.239 | Hu et al, 2020[47]       |
| Zhejiang | 2016      | AFB1 | HPLC                 | 125 | 1  | 0.0744   | 0.07 | -     | Zhou et al,<br>2017[31]  |

AFTs: includes four aflatoxins: AFB1, AFB2, AFG1, AFG2.



## References

1. Ma, J.; Shao B.; Lin, X.; Yu, H.; Li, F. Study on the natural occurrence of multi-mycotoxin in cereal and cereal-based product samples collected from parts of China in 2010. *Chin. J. Food Hyg.* **2011**, *23*, 481–488.
2. Ding, X.; Wu, L.; Li, P.; Zhang, Z.; Zhou, H.; Bai, Y.; Chen, X.; Jiang, J.; Risk Assessment on Dietary Exposure to Aflatoxin B(1) in Post-Harvest Peanuts in the Yangtze River Ecological Region. *Toxins* **2015**, *7*, 4157–4174.
3. Qin, M.; Liang, J.; Yang, D.; Yang, X.; Cao, P.; Wang, X.; Ma, N.; Zhang, L. Spatial analysis of dietary exposure of aflatoxins in peanuts and peanut oil in different areas of China. *Food Res. Int.* **2021**, *140*, 109899.
4. Zhang, X.; Ding, J.; Li, S.; Cheng, Y. Aflatoxin contamination in the marketed food in Wanzhou District, Chongqing City, 2013–2014. *Practical Preventive Medicine* **2016**, *23*, 426–428.
5. Feng, L.; Yang, D.; Li, H.; Tian, Y.; Zhao, T.; Zhang, R. Survey on pollution of aflatoxin b1 in foodstuffs. *Parasitoses Infec. Dis.* **2014**, *3*, 117–119.
6. Qiu, W.; Fu, W. Contamination of aflatoxins in peanuts and peanut products from Fujian. *Chin. J. Health Laboratory Technol.* **2012**, *22*, 2446–2448.
7. Liu, W.; Pan, W. Peanut aflatoxins contamination and evaluation on dietary exposure in Fujian province. *Cereal & Feed Industry* **2016**, *11*, 28–32.
8. Li, K.; Chen, W.; Qiu, F.; Liang, Z.; Yang, M.; Wang, Z. Dietary exposure assessment to aflatoxins in nine kinds of foodstuff by Mont Carlo non-parametric probability approach in Shenzhen City. *Wei Sheng Yan Jiu= Journal of Hygiene Research* **2018**, *47*, 827–832.
9. Pan, Z. Hazard Analysis and Detection Method Establishment of Aflatoxin B1 in Peanut Oil and Raw Materials. Master's Thesis, South China Agricultural University: Guangzhou; 2016.
10. Wang, Y.; Liu, Q.; Wu, X.; Huang, X.; Wang, F.; Li, X. Determination of anatoxin B1 in peanut by high performance liquid chromatography-tandem mass spectrometry. *Journal of Food Safety and Quality* **2019**, *10*, 2059–2063.
11. Cheng, G.; Wang, S.; Hu, D.; Pang, G.; Gao, L.; Zhan, Z. Field Investigation on Aflatoxin Contamination of Peanut in Main Peanut Production Districts in 2017. *Journal of Peanut Science* **2018**, *47*, 30–33.
12. Li, S.; Yuan, P.; Fu, P.Y.; Yang, L.; Zhang, R.; Zhang, S. Investigation of Contamination Situation of Fungaltotoxin in Some Food in Henan Province from 2014 to 2015. *China Health Industry* **2017**, *27*, 144–147.
13. Wang, Y.; Wang, J.; Lin, Q.; Li, G.; Guo, C.; Wu, X.; Li, H.; Ren, Z.; Chen, F. Investigation and Analysis of Aflatoxin in Peanut in Liaoning Area. *Liaoning Agricultural Sciences* **2020**, *2*, 77–79.
14. Hu, J.; Tian, L.; Wang, C.; Qiao, H.; Wang, M. Analysis on contamination of aflatoxins in food samples in Shaanxi Province from 2012–2015. *Journal of Hygiene Research* **2016**, *45*, 762–765.
15. Zhang X., Yue, X.; Ding, X.; Li, P.; Yu, Q.; Xie, H.; Zhang, Q.; Zhang, Z.; Zhang, W. Distribution and aflatoxin contamination by *Aspergillus flavus* in peanut from the southwest China. *Chinese Journal of Oil Crop Sciences* **2019**, *41*, 773–780.
16. Wu, X.; Zhao, K.; Lin, X. Pollution condition of mycotoxin in grain and oil in Tianjin area. *Occup and Health.* **2019**, *35*, 2996–2998.
17. Qi, N.; Yu, H.; Yang, C.; Gong, X.; Liu, Y.; Zhu, Y. Aflatoxin B1 in peanut oil from Western Guangdong, China, during 2016–2017. *Food Addit. Contam. Part B Surveill.* **2019**, *12*, 45–51.
18. Song, M.; Le, Li; Luo, Y.; Xie, C.; Chen, Z. Dietary exposure and risk assessment of aflatoxin B1 in peanut oil produced by individual workshop in Guangdong. *China Oils and Fats* **2019**, *44*, 96–101.
19. Li, K.; Qiu, F.; Jiang, L.; Yang, M. Dietary exposure assessment of aflatoxin of foodstuff and edible oil from Shenzhen residents. *Journal of Hygiene Research* **2014**, *43*, 630–636.
20. Yin, G.; Liu, S.; Liao, L. Analysis on Aflatoxin B1 Contamination in Vegetable Oils. *J. Prev. Med. Inf.* **2017**, *33*, 593–596.
21. Chen, X.; Cai, C.; Chen, Y.; He, B.; Guo, Y.; He, L.; Lu, L.; Wen, Y. Dietary exposure risk assessment of aflatoxin B1 in edible vegetable oil of residents based on margin of exposure and digital method. *Journal of Food Safety and Quality.* **2017**, *33*, 593–596.
22. Huang, S.; Luo, H.; Zeng, X.; Xiang, J.; Zhong, X.; Liu, Q. Risk assessment of aflatoxin B1 exposure in peanut oil from small workshop in Qingyuan city. *Analysis and Detection* **2019**, *21*, 66–67.
23. Zhang, W.; Liu, Y.; Liang, B.; Zhang, Y.; Zhong, X.; Luo, X.; Huang, J.; Wang, Y.; Cheng, W.; Chen, K. Probabilistic risk assessment of dietary exposure to aflatoxin B1 in Guangzhou, China. *Sci. Rep.* **2020**, *10*, 7973.
24. Cheng, H.; Zhong, X.; Chen, J.; Meng, H.; Liao, Y.; Chen, H.; Jiang, Y.; Xie, Y.; Su, Y.; Liu, Z. Exposure risk assessment of aflatoxin B1 in edible vegetable oil by using the margin of exposure in Guangxi. *Chinese Journal of Food Hygiene* **2017**, *29*, 496–499.

25. Liang, X.; Chen, F.; Li, Q.; Zhang, X.; Mo, L. Dietary exposure and risk assessment of aflatoxin B1 in the peanut oil of small workshops in Yulin City. *China Oils and Fats* **2022**, *47*, 131–136.
26. Wang, C.; Fan, Y.; Long, X.; Zhang, J.; Huang, S.; Lv, Z.; Shi, X.; Wei, Y. Exposure risk assessment of aflatoxin B1 in some foods in Nanning. *Modern Preventive Medicine* **2020**, *47*, 252–255.
27. Liu, Z.; Tang, Z.; Zhong, Y.; Cheng, H.; Meng, H.; Jiang, Y.; Chen, H.; Xie, Y.; Su, Y.; Yao, X. Investigation of aflatoxin B1 level in edible vegetable oil in the urban and rural areas of Guangxi in 2014. *J. Applied. Prev. Med.* **2015**, *21*, 377–380.
28. Li, S.; Yang, L.; Yuan, P.; Fu, P.; Zhou, S.; Chao, F.; Zhang, S.; Zhang, D. Assessment of aflatoxin B1 dietary exposure among Henan residents. *Modern Preventive Medicine* **2016**, *43*, 1008–1010.
29. Li, Y.; Ma, Y. Analysis of mycotoxin pollution in some foods in Xianyang city in 2014. *Chin. J. Health. Lab. Tec.* **2016**, *26*, 570–572.
30. Lan, S.; Liu, H.; Mei, W.; Yang, F. Determination of aflatoxin B1 in edible vegetable oil by enzymelinked immunosorbent assay. *Journal of Cereals & Oils* **2010**, *4*, 39–41.
31. Zhou, Z.; Xing, J.; Ying, L.; Zhou, X.; Zhang, S.; Li, X.; Shen, J. Investigation and analysis of aflatoxin B1 in edible vegetable oil. *China Oils and Fats* **2017**, *42*, 66–69.
32. Chen, J. Investigation and analysis on mycotoxin pollution of maize in Baise city from 2017 to 2019. *Journal of Food Safety and Quality* **2020**, *11*, 4029–4033.
33. Ji, H.; Li, Y.; Wen, Z.; Liu, Y.; Li, X.; Li, H. Aflatoxin B1 contamination detection and safety evaluation for corn at storage in Hubei province. *Cereal & Feed Industry* **2017**, *3*, 19–21.
34. Wu, R.; Li, F.; Zhang, K. Aflatoxin B1 Contamination Detection and Safety Evaluation for Corn in Nanyang. *Journal of Anhui Agri.* **2014**, *42*, 10306–10336.
35. Yang, X.; Liu, S.; Cao, X.; Liu, Z.; Jiao, H. Monitoring results of mycotoxin in 90 fresh corns in Shandong in 2016. *Occup. and Health* **2018**, *34*, 188–191.
36. Wang, Y.; Dong, Y.; Yue, H.; Li, Z.; Chen, Y.; Wang, Y.; Deng, L.; Zhao, S. Investigatin and analysis on mycotoxins contamination of maize in Shandong province. *Oils and Foods* **2016**, *24*, 69–73.
37. Zhang, H.; Li, F.; Lv, S.; Tang, S.; Yu, J. Investigation report on mycotoxin contamination of 2016 autumn harvest corn in Zouping County. *Animal Health in China* **2017**, *19*, 1–3.
38. Li, J.; Wang, S.; Wu, J.; Shen, L.; Yao, X. Investigation of mycotoxins in grain and its products in Henan Province. *Chinese Journal of Food Hygiene* **2020**, *32*, 418–421.
39. Cai, M.; Ji, W.; Liu, L.; Ma, Y. Monitoring on total aflatoxins in commercial peanuts and corn in Jiangsu area. *Chin. J. Health Lab. Tec.* **2013**, *23*, 2504–2505.
40. Zhao, J.; Huang, J.; Huang, W. Analysis on the chemical pollutants and harmful factors in Taizhou in 2013. *Chin. J. Health Lab. Tec.* **2015**, *25*, 1262–1265.
41. Hu, J.; Qiao, H.; Tian L.; Wang, M.; Wang, C.; Guo, R. Mycotoxin contamination of cereals and their products in Shaanxi Province from 2013 to 2016. *Journal of Hygiene Research* **2017**, *46*, 1013–1015.
42. Hu, J.; Tian, L.; Wang, M.; Wang, C.; Guo, R.; Qiao, H. Mycotoxins contamination in 120 corn products on sale, Shaanxi. *Modern Preventive Medicine* **2017**, *44*, 1593–1596.
43. Jiang, D.; Li, F.; Zheng, F.; Zhou, J.; Li, L.; Shen, F.; et al. Occurrence and dietary exposure assessment of multiple mycotoxins in corn-based food products from Shandong, China. *Food Addit. Contam. Part B Surveill.* **2019**, *12*, 10–17. doi: 10.1080/19393210.2018.1503341.
44. Wang, D.; Ma, S. Analysis of Aflatoxin contamination in some food in Weifang. *The Urban and Rural enterprise Health in China* **2015**, *30*, 71–73.
45. Gong, C.; Dong, F.; Wang, C. Investigation and Analysis of Mycotoxins Contamination in Cereal and Its Products Sold in Yantai Market. *Food Research and Development* **2018**, *39*, 189–194.
46. Yang, X.; Jiao, H.; Liu, S.; Cao, X. Aflatoxin contamination investigation of vegetable oil and corn flour samples in Jinan 2011-2013. *Chin. J. of PHM.* **2016**, *32*, 681–683.
47. Hu, W.; Dong, H.; Ning, X.; Lin, J.; Liu, Z. Risk assessment of dietary exposure to aflatoxin B1 in parts foods in Yunnan province. *Journal of Food Safety and Quality* **2020**, *11*, 5215–5219.
